# Supplementary material for: Knowledge about iodine requirements during pregnancy and breastfeeding among pregnant women living in Northern Ireland
Source: Springer Nature journal article supplement (doi:10.1186/s40795-019-0285-8), 2019-03-11
Supplement: MOESM1 [file 25669084]

## **Iodine knowledge questionnaire**

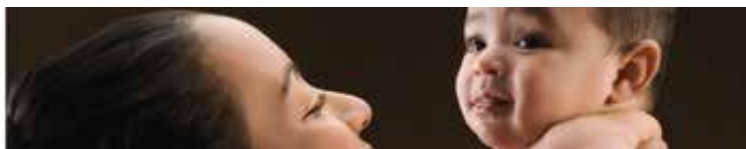

This questionnaire is designed to tell us about a nutrient in your diet called iodine. We are currently undertaking a study looking at this in detail but we are keen to find out what pregnant women know about this nutrient.

Your answers are confidential and your personal details are not requested in this questionnaire.

Please answer every question, if you are unsure about how to answer, please do the best you can.

### **CONTACT INFORMATION**

Dr Paul McMullan  
Regional Centre for Endocrinology and Diabetes  
Royal Victoria Hospital  
Grosvenor Road  
Belfast BT12 6BA

Phone: 02890 247026 (a message can be left on the answer machine at all times)

Mobile: 07872580589

Email: [paul.mcmullan@belfasttrust.hscni.net](mailto:paul.mcmullan@belfasttrust.hscni.net)

1. Is this your first pregnancy? Yes  No

2. How many weeks pregnant are you?

<12  13-28  >29

3. Which foods are considered good sources of iodine in the U.K diet?

|            |                          |              |                          |      |                          |
|------------|--------------------------|--------------|--------------------------|------|--------------------------|
| Bread      | <input type="checkbox"/> | Poultry      | <input type="checkbox"/> | Meat | <input type="checkbox"/> |
| Fruit      | <input type="checkbox"/> | Seafood/fish | <input type="checkbox"/> | Salt | <input type="checkbox"/> |
| Dairy      | <input type="checkbox"/> | Soya milk    | <input type="checkbox"/> | Eggs | <input type="checkbox"/> |
| Vegetables | <input type="checkbox"/> | Not sure     | <input type="checkbox"/> |      |                          |

4. Which gland in the body needs this nutrient called iodine to produce essential hormones?

Adrenal  Thyroid  Ovaries   
not sure  other  (if other, please state) \_\_\_\_\_

5. What happens to your iodine requirements during pregnancy?

Increase  Decrease  Stays the same   
Not sure

6. What happens to your iodine requirements if you breast feed?

Increase  Decrease  Stays the same   
Not sure

7. Are you aware of any potentially harmful effects from a lack of adequate iodine in your diet?

Yes  No  Not sure

If yes, what potential harmful effects are you aware of? \_\_\_\_\_

8. Can you have too much iodine in your diet?

Yes  No  Not sure

9. After becoming pregnant, do you feel you were given enough information about the following nutrients? (mark with X)

|            | Strongly disagree        | Disagree                 | Neither                  | Agree                    | strongly agree           |
|------------|--------------------------|--------------------------|--------------------------|--------------------------|--------------------------|
| Calcium    | <input type="checkbox"/> | <input type="checkbox"/> | <input type="checkbox"/> | <input type="checkbox"/> | <input type="checkbox"/> |
| Folic Acid | <input type="checkbox"/> | <input type="checkbox"/> | <input type="checkbox"/> | <input type="checkbox"/> | <input type="checkbox"/> |
| Iodine     | <input type="checkbox"/> | <input type="checkbox"/> | <input type="checkbox"/> | <input type="checkbox"/> | <input type="checkbox"/> |
| Iron       | <input type="checkbox"/> | <input type="checkbox"/> | <input type="checkbox"/> | <input type="checkbox"/> | <input type="checkbox"/> |
| Vitamin D  | <input type="checkbox"/> | <input type="checkbox"/> | <input type="checkbox"/> | <input type="checkbox"/> | <input type="checkbox"/> |

Any other comments?
